# Supplementary material for: Evolution and Expression Divergence of E2 Gene Family under Multiple Abiotic and Phytohormones Stresses inBrassica rapa
Source: Hindawi journal article supplement (doi:10.1155/2018/5206758), 2018-08-27
Supplement: f1 [file 5206758.f1.pdf]

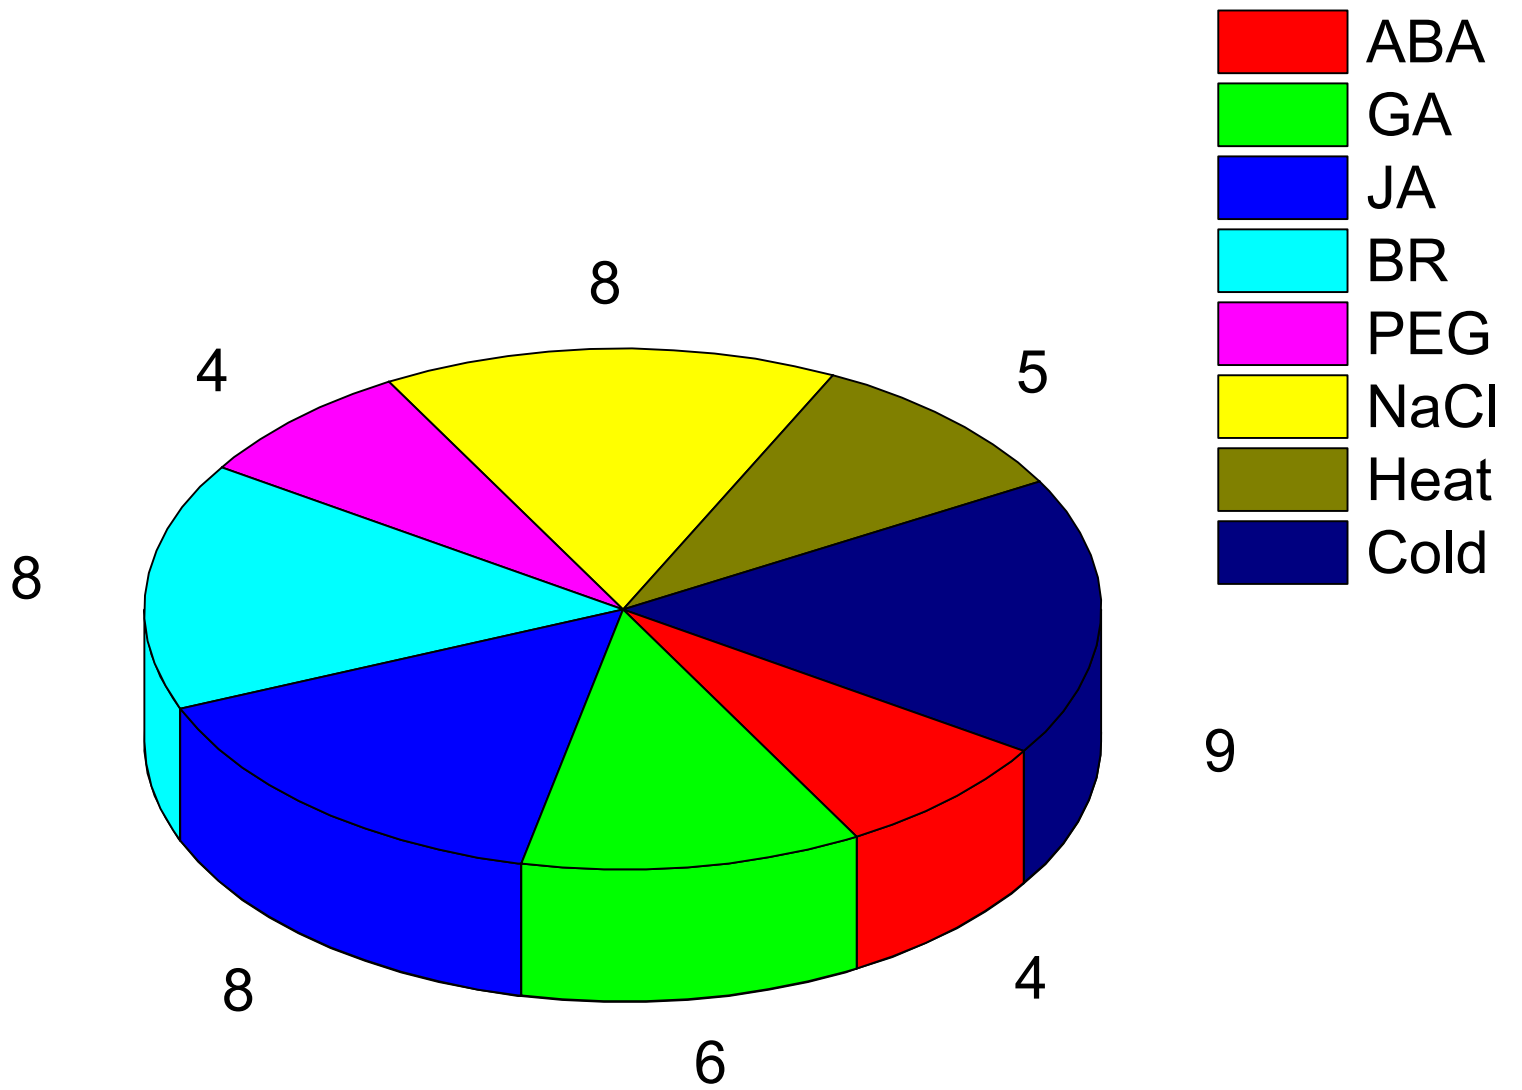

**PCC Greater 0.5**
