# Supplementary material for: Evolution and Expression Divergence of E2 Gene Family under Multiple Abiotic and Phytohormones Stresses in Brassica rapa
Source: Biomed Res Int. 2018 Aug 27;2018:5206758. doi: 10.1155/2018/5206758 (PMC6129857; doi:10.1155/2018/5206758)
Supplement: Supplementary 2 — Table. 1. Sequences of the BraE2 gene primers used for quantitative real-time PCR. [file 5206758.f2.xlsx]

## Sheet: Sheet1
Table. 1	Sequences of the BraE2 gene primers used for quantitative real-time PCR
Genes	Sense Primer (5'->3')	Anti-Sense Primer (5'->3')
BraE2-5	TCCTTCAGACAGTCCTTAC	TCCATTGCTCCTTCAAGA
BraE2-7	CATTAACAGCAACGGAAG	GATAACAGCACCTTGGAA
BraE2-6	GAATGTCAACAGTAATGG	CAGAAGAACCTTGGATAT
BraE2-12	AACGGCAGTATCTGTCTT	GCTACGGTCTGTCTTGTA
BraE2-19	TTATGGTTCTTGGTCCTTCT	TGCTTAGCGATGTTCTCA
BraE2-68	GTCCTTCTCAATCACCTTATG	AGCCTCATTACTCTTCCAAT
BraE2-38	TTGCTTGGACATTCTTCAG	CAACCATCTTCCTATACTCTTC
BraE2-39	GCAATGATACTGTCTTCCAA	CAACCATCTTCCTATACTCTTC
BraE2-42	ACTCCTGATACCGTGATG	TGCCAAGATAATCCTCCAT
BraE2-44	ACGACGATGACTATTCTGAT	TAGATTCCACTTCCTGTTGT
BraE2-46	GCTGTGATTCCTGAAGTG	TCTCCATAGATGTGTTCCAA
BraE2-48	CTGTTGATTCTGATGCTTCT	ATCTTCCAGTCTGCTTGA
BraE2-56	AATCGCCACCAATAGACT	CCATAGGATAATGCTCAGGAA
BraE2-57	CGATGGACTATTGAAGTGAAG	ATGTGACCGTTGCTGTAA
BraE2-65	TCAGATATGTGGCATCCTAA	TTCTTCTTGAACTCGTCTCT
BraE2-66	GGAGCGTTACCATTATCG	AGTATGAACAGGCATCCA
BraE2-72	ATGGCAAGTAACGAGAATC	CAACTGGTCCTTCAATATCA
BraE2-73	GCCAAGACCAACAAGAAG	GACCTATCAAGACCTGCTAT
BraE2-74	GGAGGAGTGTGGAAGATAA	TCAGATGGGTTTGGATACA
BraE2-75	GGAGGAGTGTGGAAGATAA	CGATCACGCATCATCAAT
BraE2-9..	TGGCAAGCAACTATTATGG	GACAGAAGAACCTTGGATAC
BraE2-31..	CTGGCAAGCAACTATTATGG	GAGCATATAGACAGAAGAACCT
BraE2-17	CTTATTCAGGCGGAGTCTT	AGCAGAACCTTGGATATGG
BraE2-18	GAGATGGCTGAACTTAACG	AGTCTTGAACACCACCTT
BraE2-30	AGTTGACTCTTCAGTTCACT	TGCTCCACAATCTCCATAA
BraE2-34	CCTCAGGACAACAACATCT	GAATCGCAGCAACATCATAA
BraE2-54	GCGAACGAGACCTATCAG	GAGACCACGAATCATACAGA
BraE2-55	GAATCTCCTCAGGCAACTT	GAACCACCATCTCGTCTC
BraE2-35	CCAGACTACTTGCTTCCA	TCTCAACCATCTTCCTATACTC
BraE2-69	GCTCACCATTGAACACTC	GGCATCTTCCTATACTCTGT
Actin	CTCAGTCCAAAAGAGGTATTCT	GTAGAATGTGTGATGCCAGATC
