# Supplementary material for: Evolution and Expression Divergence of E2 Gene Family under Multiple Abiotic and Phytohormones Stresses in Brassica rapa
Source: Biomed Res Int. 2018 Aug 27;2018:5206758. doi: 10.1155/2018/5206758 (PMC6129857; doi:10.1155/2018/5206758)
Supplement: Supplementary 3 — Table. 2. The basic description of BraE2 genes in Brassica rapa. [file 5206758.f3.xlsx]

## Sheet: Sheet1
Table. 2	The basic description of BraE2 genes in Brassica rapa
Gene ID	Protien Identifier	cDNA (bp)	Chr: Start-End Point	Exon	Subceullar Predication	PI	GRAVY	Protein length (aa)	MW (KDa)
Bra029711	BraE2-1	3147	A05:23290504-23293651	5	nucl: 11, chlo: 1, mito: 1, golg_plas: 1	6.19	-0.336	310	34.6777
Bra001347	BraE2-2	1089	A03:15967143-15968232	5	nucl: 11.5, cyto_nucl: 6.5, mito: 1, golg_plas: 1	7.71	-0.374	148	16.5371
Bra041101	BraE2-3	1118	Scaffold:855-1973	5	cyto_nucl: 5, mito: 2, chlo: 1, extr: 1, golg_plas: 1	7.71	-0.373	148	16.5511
Bra010388	BraE2-4	4480	A08:13452950-13457430	4	plas: 9, vacu: 3, mito: 1, E.R.: 1	9.39	0.119	648	72.6738
Bra003066	BraE2-5	1100	A10:5578191-5579291	5	nucl: 6.5, cyto_nucl: 4.5, chlo: 3, mito: 2, cyto: 1.5, extr: 1	7.71	-0.322	148	16.5231
Bra002842	BraE2-6	950	A10:7261919-7262869	6	cyto: 6.5, cyto_nucl: 5, chlo: 3, nucl: 2.5, mito: 2	6.82	-0.424	148	16.5899
Bra029076	BraE2-7	981	A03:6230229-6231210	5	nucl: 4.5, cyto_nucl: 4, chlo: 3, mito: 3, cyto: 2.5, extr: 1	7.71	-0.321	148	16.5371
Bra022645	BraE2-8	998	A02:7270928-7271926	5	nucl: 4.5, cyto_nucl: 4, chlo: 3, mito: 3, cyto: 2.5, extr: 1	7.71	-0.321	148	16.5371
Bra035605	BraE2-9	947	A02:6319044-6319991	5	cyto: 4.5, cyto_nucl: 4.5, nucl: 3.5, chlo: 3, mito: 3	7.73	-0.332	148	16.565
Bra027749	BraE2-10	1021	A09:6906181-6907202	4	nucl: 4.5, chlo: 4, cyto_nucl: 3.5, mito: 3, cyto: 1.5, extr: 1	8.51	-0.341	152	17.2428
Bra013049	BraE2-11	795	A03:20797023-20797818	4	nucl: 7, cyto: 3, mito: 2, chlo: 1, plas: 1	7.68	-0.218	148	16.6783
Bra028946	BraE2-12	1158	A03:5553611-5554769	5	cyto_nucl: 5, nucl: 4.5, cyto: 4.5, chlo: 3, mito: 2	7.74	-0.354	140	15.5007
Bra026294	BraE2-13	4649	A01:9968447-9973096	6	plas: 9, vacu: 2, E.R.: 2, mito: 1	9.2	0.098	638	72.0741
Bra001995	BraE2-14	2108	A07:2774897-2777005	4	nucl: 5.5, cyto_nucl: 4, chlo: 3, mito: 3, cyto: 1.5, extr: 1	4.94	-0.463	180	20.1697
Bra032244	BraE2-15	965	A05:12529324-12530289	5	cyto: 6, nucl: 4, plas: 2, extr: 1, pero: 1	7.79	-0.523	150	17.1937
Bra022755	BraE2-16	1315	A03:6856535-6857850	5	chlo: 7, nucl: 3.5, cyto_nucl: 3, cyto: 1.5, extr: 1, golg: 1	4.98	-0.38	192	21.1179
Bra027688	BraE2-17	484	A09:7365012-7365496	4	nucl: 6, cyto: 6, extr: 1, cysk: 1	7.78	-0.261	111	12.3842
Bra027422	BraE2-18	1176	A05:21545317-21546493	4	chlo: 6, mito: 5, nucl: 2, cyto: 1	9.04	-0.214	183	20.2864
Bra008383	BraE2-19	1278	A02:14211715-14212993	8	mito: 7, chlo: 4, nucl: 2, plas: 1	6.15	-0.356	153	17.2499
Bra026700	BraE2-20	1353	A09:35025575-35026928	8	mito: 7, chlo: 3, cyto: 2, nucl: 1, plas: 1	6.74	-0.32	153	17.2058
Bra016626	BraE2-21	1524	A08:18561800-18563324	8	mito: 7, chlo: 5, nucl: 1, plas: 1	6.74	-0.321	153	17.2058
Bra026018	BraE2-22	1782	A06:6184126-6185908	8	mito: 6, chlo: 4, cyto: 2, nucl: 1, plas: 1	6.74	-0.319	153	17.2199
Bra013255	BraE2-23	1734	A03:19613713-19615447	6	nucl: 8, plas: 2.5, cyto: 2, golg_plas: 2, cysk: 1	7.09	-0.564	431	46.8458
Bra003210	BraE2-24	850	A07:15177769-15178619	5	nucl: 6, chlo: 4, cyto: 2, plas: 1, pero: 1	5.19	-0.441	167	18.7432
Bra014751	BraE2-25	1099	A04:2785651-2786750	5	chlo: 5, nucl: 4, cyto: 2, plas: 2, mito: 1	5.92	-0.471	167	18.7823
Bra026833	BraE2-26	762	A09:35670246-35671008	6	nucl: 10.5, cyto_nucl: 6.5, cyto: 1.5, chlo: 1, golg_plas: 1	5.34	-0.589	152	17.2814
Bra026222	BraE2-27	813	A06:5209293-5210106	6	nucl: 10.5, cyto_nucl: 6.5, cyto: 1.5, chlo: 1, golg_plas: 1	5.63	-0.601	152	17.2895
Bra017410	BraE2-28	882	A09:14045299-14046181	7	nucl: 9.5, cyto_nucl: 6, cyto: 1.5, chlo: 1, extr: 1, golg_plas: 1	5.37	-0.567	152	17.2895
Bra016703	BraE2-29	1385	A08:18842366-18843751	6	nucl: 11.5, cyto_nucl: 6.5, plas: 1.5, golg_plas: 1.5	8.5	-0.72	210	23.9389
Bra029252	BraE2-30	948	A02:25761347-25762295	6	nucl: 9.5, cyto_nucl: 6.5, cyto: 2.5, chlo: 1, golg_plas: 1	5.63	-0.482	150	17.1325
Bra035606	BraE2-31	3618	A02:6314768-6318386	3	cyto: 5, nucl: 4, mito: 3, plas: 1, pero: 1	5.63	-0.12	299	33.4022
Bra026582	BraE2-32	842	A02:20310948-20311790	7	nucl: 10.5, cyto_nucl: 6.5, cyto: 1.5, chlo: 1, golg_plas: 1	5.37	-0.562	152	17.2795
Bra024808	BraE2-33	899	A06:22493341-22494240	7	nucl: 10.5, cyto_nucl: 6.5, cyto: 1.5, chlo: 1, golg_plas: 1	5.37	-0.562	152	17.2795
Bra016264	BraE2-34	826	A07:21845229-21846055	6	nucl: 4.5, cyto_nucl: 4.5, cyto: 3.5, chlo: 2, mito: 2, extr: 1, golg_plas: 1	5.34	-0.551	152	17.2985
Bra018852	BraE2-35	1146	A06:1613145-1614291	6	nucl: 8.5, cyto_nucl: 5, chlo: 2, extr: 2, cysk: 1	5.17	-0.447	181	19.9626
Bra030487	BraE2-36	1085	A05:11926943-11928028	6	nucl: 7.5, nucl_plas: 5.33333, cyto_nucl: 5.16667, chlo: 2, extr: 2, cyto: 1.5	5.68	-0.373	174	19.2909
Bra022904	BraE2-37	645	A03:7674330-7674975	2	nucl: 5, mito: 5, chlo: 4	9.54	-0.241	180	20.2495
Bra035819	BraE2-38	1316	A05:18094674-18095990	6	chlo: 4, nucl: 4, extr: 2, cysk: 2, cyto: 1, plas: 1	5.04	-0.385	181	20.0047
Bra038253	BraE2-39	1334	A01:20448918-20450252	6	nucl: 6, chlo: 3, extr: 2, cyto: 1, mito: 1, plas: 1	5.01	-0.405	181	19.9876
Bra034405	BraE2-40	6948	A05:13638077-13645025	5	plas: 6, nucl: 2, vacu: 2, golg: 2, cyto: 1, E.R.: 1	9.83	-0.007	249	28.038
Bra016704	BraE2-41	816	A08:18844995-18845811	5	nucl: 9.5, cyto_nucl: 5.5, plas: 1.5, golg_plas: 1.5, chlo: 1, mito: 1	5.11	-0.531	152	17.4197
Bra021105	BraE2-42	2587	A01:23127661-23130248	7	nucl: 13, cysk: 1	4.73	-0.6	597	65.9982
Bra040814	BraE2-43	2527	Scaffold000267:27674-30201	6	nucl: 9, cyto: 2, mito: 2, chlo: 1	8.94	-0.484	465	52.1422
Bra027252	BraE2-44	2568	A05:20669737-20672305	6	cyto: 5, E.R.: 2.5, E.R._plas: 2.5, plas: 1.5, chlo: 1, nucl: 1, mito: 1, vacu: 1, golg: 1	4.82	-0.52	550	60.6344
Bra041020	BraE2-45	1314	Scaffold000383:14390-15704	7	chlo: 7.5, chlo_mito: 5.5, nucl: 3, mito: 2.5, cyto: 1	8.31	-0.453	329	37.3203
Bra019007	BraE2-46	2140	A06:786396-788536	6	nucl: 12, mito: 2	6.62	-0.489	497	55.6838
Bra001591	BraE2-47	2056	A03:17259373-17261429	8	nucl: 12, cyto: 1, mito: 1	5.01	-0.665	539	60.2621
Bra030965	BraE2-48	2360	A08:1172641-1175001	7	nucl: 14	8.81	-0.475	470	51.8486
Bra002005	BraE2-49	9625	A07:2666793-2676418	9	nucl: 13, chlo: 1	4.87	-0.814	1662	185.257
Bra021874	BraE2-50	3153	A04:15071402-15074555	9	nucl: 11, chlo: 1, cyto: 1, vacu: 1	4.85	-0.287	865	95.7674
Bra017778	BraE2-51	5500	A03:30442558-30448058	8	cyto: 8, mito: 3, nucl: 2, vacu: 1	5.01	-0.489	895	98.9996
Bra038095	BraE2-52	1667	A05:10684563-10686230	8	cyto: 7, nucl: 2, pero: 2, plas: 1, extr: 1, E.R.: 1	9.47	-0.362	325	37.1857
Bra013040	BraE2-53	8635	A03:20861505-20870140	8	nucl: 11, chlo: 2, mito: 1	4.63	-0.616	1243	137.963
Bra015843	BraE2-54	1637	A07:23840834-23842471	6	nucl: 9.5, cyto_nucl: 6, cyto: 1.5, mito: 1, cysk: 1, golg_plas: 1	7.04	-0.466	161	18.4701
Bra027470	BraE2-55	1194	A09:11028139-11029333	6	chlo: 6, mito: 3, cyto: 2, nucl: 1, extr: 1, E.R.: 1	8.32	-0.383	174	19.8377
Bra011680	BraE2-56	928	A01:1080006-1080934	6	nucl: 8.5, cyto_nucl: 5, mito: 2, plas: 1.5, golg_plas: 1.5, chlo: 1	8.99	-0.657	161	18.5241
Bra017759	BraE2-57	862	A03:30345285-30346147	4	nucl: 11.5, cyto_nucl: 6.5, plas: 1.5, golg_plas: 1.5	9.17	-0.726	161	18.512
Bra036332	BraE2-58	1562	A02:21594894-21596456	6	mito: 8, nucl: 2.5, cyto_nucl: 2.5, cyto: 1.5, chlo: 1, extr: 1	8.72	-0.415	122	13.7277
Bra032210	BraE2-59	1905	A05:13008893-13010798	6	nucl: 13, mito: 1	8.83	-0.602	189	21.2271
Bra014602	BraE2-60	1601	A04:1700562-1702163	5	nucl: 6.5, cyto_nucl: 5.5, cyto: 3.5, plas: 2, pero: 1, cysk: 1	8.42	-0.493	160	17.8744
Bra003301	BraE2-61	1555	A07:15766076-15767631	5	nucl: 5, cyto: 3, mito: 3, plas: 2, pero: 1	8.42	-0.481	160	17.8434
Bra007363	BraE2-62	1360	A09:30336001-30337361	5	nucl: 5, cyto: 3, mito: 3, plas: 2, pero: 1	8.41	-0.501	160	17.8634
Bra014406	BraE2-63	1312	A04:363381-364693	5	nucl: 5, mito: 5, cyto: 2, plas: 2	8.39	-0.712	160	18.1726
Bra007157	BraE2-64	1168	A09:29141569-29142737	5	nucl: 8, chlo: 3, cyto: 2, mito: 1	5.2	-0.444	167	18.8724
Bra002579	BraE2-65	1073	A10:8837540-8838613	6	cyto: 6, chlo: 2, nucl: 2, extr: 2, plas: 1, golg: 1	5.19	-0.458	159	18.0244
Bra020324	BraE2-66	1013	A02:5197616-5198629	6	nucl: 6, cyto: 6, pero: 2	5.56	-0.415	170	19.1749
Bra039295	BraE2-67	1121	A04:18825889-18827010	6	nucl: 9, cyto: 5	4.23	-0.633	189	21.3397
Bra035071	BraE2-68	1562	A07:25318885-25320447	8	mito: 7, chlo: 4, nucl: 2, plas: 1	5.48	-0.309	139	15.4658
Bra014255	BraE2-69	665	A08:2158406-2159071	4	chlo: 6, extr: 5, nucl: 2, cyto: 1	8.32	-0.254	164	18.5983
Bra036549	BraE2-70	908	A09:2857280-2858188	6	chlo: 4, cyto: 4, nucl: 2, mito: 2, extr: 2	7.62	-0.228	190	21.5078
Bra009857	BraE2-71	8943	A06:18336926-18345869	7	nucl: 5, cyto: 3, chlo: 2, pero: 2, mito: 1, plas: 1	8.69	-0.238	163	18.3843
Bra009086	BraE2-72	1024	A10:15280842-15281868	8	cyto: 10, nucl: 2, mito: 1, E.R._vacu: 1	8.36	-0.339	201	22.0453
Bra005836	BraE2-73	2436	A03:858589-861025	8	nucl: 5, cyto: 4, chlo: 3, mito: 1, plas: 1	5.72	-0.37	319	34.8986
Bra028493	BraE2-74	1438	A07:14339639-14341077	6	nucl: 10, cyto: 3, mito: 1	4.21	-0.664	184	21.0004
Bra025505	BraE2-75	1527	A04:8644886-8646413	6	nucl: 7, cyto: 7	4.19	-0.668	186	21.1686
Bra000410	BraE2-76	1126	A03:11002378-11003504	6	cyto: 9, nucl: 5	4.32	-0.614	187	21.1586
Bra010575	BraE2-77	871	A08:14494582-14495453	6	cyto: 7, chlo: 2, mito: 2, extr: 2, nucl: 1	7.7	-0.47	185	20.9008
Bra036361	BraE2-78	930	A02:21196572-21197502	5	cyto: 5, E.R.: 3, nucl: 2, vacu: 2, chlo: 1, golg: 1	6.59	-0.319	198	22.2494
Bra014836	BraE2-79	897	A04:3530240-3531137	5	cyto: 7, mito: 3, nucl: 2, chlo: 1, plas: 1	7.7	-0.482	187	21.0009
Bra038542	BraE2-80	878	A09:5601754-5602632	6	cyto: 8, mito: 4, chlo: 1, nucl: 1	8.8	-0.501	184	20.8089
Bra017784	BraE2-81	898	A03:30503619-30504517	5	cyto: 5, nucl: 3, mito: 3, chlo: 2, plas: 1	7.7	-0.483	187	20.9248
Bra011708	BraE2-82	902	A01:946917-947819	6	cyto: 7, mito: 3, nucl: 2, chlo: 1, extr: 1	7.7	-0.458	185	20.8878
Bra015390	BraE2-83	989	A10:1643145-1644134	6	nucl: 8.5, cyto_nucl: 5, chlo: 2, mito: 1, cysk: 1, golg_plas: 1	6.03	-0.068	149	16.8773
