# Supplementary material for: Evolution and Expression Divergence of E2 Gene Family under Multiple Abiotic and Phytohormones Stresses in Brassica rapa
Source: Biomed Res Int. 2018 Aug 27;2018:5206758. doi: 10.1155/2018/5206758 (PMC6129857; doi:10.1155/2018/5206758)
Supplement: Supplementary 4 — Table. 3. Identification of BraE2 syntenic genes between A. thaliana along with three subgenomes of Brassica rapa. [file 5206758.f4.xlsx]

## Sheet: Sheet1
Table. 3	Identification of BraE2 syntenic genes between A. thaliana along with three subgenomes of Brassica rapa
tPCK Chr	Block	A.thaliana		B.rapa
			Synteny Ortholog			Non-Synteny Ortholog
			LF	MF1	MF2
tPCK2	F	AT3G08690	BraE2-1		BraE2-2
tPCK4	U	AT4G27980	BraE2-13		BraE2-4
tPCK5	wb	AT5G5330	BraE2-5	BraE2-7	BraE2-8
tPCK5	wb	AT5G56150	BraE2-6	BraE2-12
tPCK5	wb	AT5G56170	Bra002840..			BraE2-9..
						BraE2-31..
		-				BraE2-10
tPCK2	H	AT2G16740	BraE2-14		BraE2-11
		-				BraE2-15
tPCK5	wb	AT5G50870				BraE2-16
tPCK7	D	AT1G64230				BraE2-17
tPCK2	F	AT3G1550				BraE2-18
tPCK6	E	AT1G78870	BraE2-68	BraE2-19
tPCK1	A	AT1G16890	BraE2-22	BraE2-21	BraE2-20
tPCK2	F	AT3G24515				BraE2-23..
tPCK6	N	AT3G55380	BraE2-64	BraE2-25	BraE2-24
tPCK1	A	AT1G14400	BraE2-27	BraE2-29..	BraE2-26
				BraE2-41..
tPCK7	K	AT2G02760	BraE2-33	BraE2-32	BraE2-28
tPCK7	X	AT5G62540				BraE2-30
		-				BraE2-34
tPCK1	C	AT1G50490	BraE2-35	BraE2-69	BraE2-36
tPCK3	J	AT2G32790				BraE2-37
tPCK2	F	AT3G20060	BraE2-38	BraE2-39
tPCK1	B	AT1G36340				BraE2-40
tPCK2	F	AT3G15355	BraE2-44	BraE2-42	BraE2-47
tPCK1	C	AT1G53020	BraE2-46	BraE2-48	BraE2-52
tPCK2	H	AT2G16920	BraE2-49		BraE2-53
tPCK3	J	AT2G33770				BraE2-50
		-				BraE2-51
tPCK6	E	AT1G75440				BraE2-54
tPCK7	V	AT5G42990				BraE2-55
tPCK4	U	AT4G3610	BraE2-56	BraE2-57
		-				BraE2-58
tPCK1	C	AT1G45050				BraE2-59
tPCK6	N	AT3G57870	BraE2-62	BraE2-60	BraE2-61
		-				BraE2-63
tPCK5	wb	AT5G59300	BraE2-65	BraE2-66
tPCK3	J	AT2G46030		BraE2-67	BraE2-76
tPCK7	Q	AT5G25760	BraE2-71		BraE2-70
tPCK5	R	AT5G05080	BraE2-72	BraE2-73
tPCK4	S	AT5G41340	BraE2-75	BraE2-74
tPCK4	U	AT4G36800	BraE2-82	BraE2-81	BraE2-77
						BraE2-78
		-				BraE2-79
tPCK2	H	AT2818600				BraE2-80
		-				BraE2-83
