# Supplementary material for: Evolution and Expression Divergence of E2 Gene Family under Multiple Abiotic and Phytohormones Stresses in Brassica rapa
Source: Biomed Res Int. 2018 Aug 27;2018:5206758. doi: 10.1155/2018/5206758 (PMC6129857; doi:10.1155/2018/5206758)
Supplement: Supplementary 5 — Table. 4. The gene with outlier Ka/Ks values and estimated divergence time for syntenic pairs of BraE2. [file 5206758.f5.xlsx]

## Sheet: Sheet1
Table. 4	The gene with outlier Ka/Ks values and estimated divergence time for syntenic pairs of BraE2.
Gene 1	Gene 2	Ks	Ka	Ka/Ks	Selection Pressure	Duplication time (MYA)
BraE2-5	BraE2-7	0.222112	0.00290276	0.0130689	Segmental	7.40374
BraE2-6	BraE2-12	0.233529	0.0450296	0.192822	Segmental	7.7843
BraE2-19	BraE2-68	0.188115	0.00631915	0.033592	Segmental	6.27048
BraE2-38	BraE2-39	0.215762	0.0168411	0.0780543	Segmental	7.19205
BraE2-42	BraE2-44	0.173203	0.163439	0.943629	Segmental	5.77343
BraE2-46	BraE2-48	0.191499	0.175	0.913843	Segmental	6.3833
BraE2-56	BraE2-57	0.238333	0.0188901	0.0792595	Segmental	7.94443
BraE2-65	BraE2-66	0.340494	0.052	0.152719	Segmental	11.3498
BraE2-72	BraE2-73	0.277959	0.0418561	0.150584	Segmental	9.2653
BraE2-74	BraE2-75	0.148517	0.00935502	0.0629894	Segmental	4.95058
BraE2-9..	BraE2-31..	0.20252	0.102802	0.507612	Tandem Array	6.75068
