# Supplementary material for: Evolution and Expression Divergence of E2 Gene Family under Multiple Abiotic and Phytohormones Stresses in Brassica rapa
Source: Biomed Res Int. 2018 Aug 27;2018:5206758. doi: 10.1155/2018/5206758 (PMC6129857; doi:10.1155/2018/5206758)
Supplement: Supplementary 6 — Table. 5. The FPKM values of BraE2 genes. [file 5206758.f6.xlsx]

## Sheet: Sheet1
Table. 5	The FPKM values of BraE2 genes
Gene ID	Root	Stem	Leaf	Flower	Silique
BraE2-1	50.2131	55.8333	52.705	106.837	125.356
BraE2-2	347.372	263.819	142.021	607.742	859.609
BraE2-3	374.209	221.341	192.992	1058.44	979.827
BraE2-4	72.9893	33.3212	52.2146	44.3542	63.6998
BraE2-5	638.802	248.827	273.146	237.647	610.663
BraE2-6	20.0334	20.6141	42.0225	57.8982	105.855
BraE2-7	404.448	219.259	192.603	121.473	293.629
BraE2-8	798.691	426.441	417.112	219.483	575.555
BraE2-9	12.0957	9.99472	43.5789	209.644	139.367
BraE2-10	0.361645	0.394441	0.372428	0.362302	2.54749
BraE2-11	57.4544	34.1486	7.39285	91.5775	2.12775
BraE2-12	195.725	92.3435	101.71	292.841	299.241
BraE2-13	33.598	10.5517	14.8244	17.4843	27.0332
BraE2-14	402.818	82.2057	17.1904	123.079	4.72017
BraE2-15	0	0	0	0.370185	31.2285
BraE2-16	93.9197	116.261	84.4757	127.549	206.761
BraE2-17	250.07	134.229	290.839	99.6702	99.6343
BraE2-18	14.0853	16.7904	25.7228	16.8881	19.1985
BraE2-19	70.8398	36.594	51.2189	59.1499	64.0309
BraE2-20	78.7109	50.6087	70.7484	81.7344	65.5435
BraE2-21	65.8309	42.6281	32.4263	42.3012	112.432
BraE2-22	49.3732	15.9612	22.4774	19.3582	40.8386
BraE2-23	4.59251	2.73584	1.96102	2.28102	1.16315
BraE2-24	26.4507	25.3489	12.5142	8.7473	17.5964
BraE2-25	148.124	80.9848	94.3378	102.468	128.013
BraE2-26	28.9316	14.5943	11.1728	24.9988	29.5509
BraE2-27	108.493	20.7081	38.7325	55.7944	87.6336
BraE2-28	1.08493	0.986102	1.11728	2.17381	8.15196
BraE2-29	196.271	92.4574	156.671	21.5017	59.7489
BraE2-30	73.9273	68.0644	114.935	190.275	159.265
BraE2-31	0.558715	0.871492	0	7.20287	90.7017
BraE2-32	173.589	47.1357	133.702	32.6071	64.7062
BraE2-33	64.0111	28.2025	29.4218	41.6647	71.3296
BraE2-34	318.247	145.351	198.876	280.421	323.021
BraE2-35	145.098	110.795	31.8265	17.1629	64.3782
BraE2-36	69.5343	160.297	63.5969	23.1895	27.7078
BraE2-37	2.77614	1.29571	0	0.558182	84.5698
BraE2-38	47.0813	21.5315	18.4707	24.0834	59.306
BraE2-39	36.6188	13.4037	23.5857	30.1734	76.0833
BraE2-40	0	0	0	0	10.5781
BraE2-41	0	0	0	0	1.01899
BraE2-42	7.53091	8.42943	4.19826	9.84922	16.1094
BraE2-43	4.20745	2.76539	1.62581	3.26106	7.34476
BraE2-44	4.43317	2.36372	1.20303	5.60264	13.4304
BraE2-45	1.48957	1.59514	0	0.125593	1.59961
BraE2-46	8.4876	4.61328	2.93493	15.7367	20.541
BraE2-47	0	0	0	0.0707505	1.60432
BraE2-48	7.25298	2.00978	5.74796	9.82964	10.8837
BraE2-49	19.2058	17.0881	12.1014	15.5496	19.5077
BraE2-50	144.986	26.4626	12.9798	28.336	20.0349
BraE2-51	14.1742	8.84412	4.73961	17.685	17.6452
BraE2-52	3.02401	2.70132	1.69706	1.0198	2.70583
BraE2-53	4.04213	3.64689	3.87545	3.56067	3.50378
BraE2-54	42.1861	40.0119	29.2128	27.4412	43.2758
BraE2-55	43.8241	20.1709	31.3464	41.9759	62.446
BraE2-56	3.95495	0.352528	2.03811	3.96741	0
BraE2-57	9.22821	1.23385	1.35874	5.28988	0
BraE2-58	0	0	0	0	0
BraE2-59	47.2727	17.0887	28.0064	44.7035	58.2723
BraE2-60	66.9045	32.82	41.1642	48.7438	39.468
BraE2-61	129.815	57.6134	73.0665	61.0967	53.0938
BraE2-62	20.3043	35.674	10.6341	10.6836	14.0957
BraE2-63	94.8646	54.7595	54.8856	76.4543	103.369
BraE2-64	37.9645	28.3118	20.2152	37.4884	58.5079
BraE2-65	57.4908	22.7464	23.5588	39.7861	41.7535
BraE2-66	10.293	7.80732	6.86913	9.12088	7.2796
BraE2-67	44.1729	27.4215	24.2722	82.1297	59.3718
BraE2-68	43.3401	3.33357	9.51877	47.5178	59.0446
BraE2-69	0	0.170234	0	0	0
BraE2-70	44.0908	25.7359	35.9988	30.4362	30.5536
BraE2-71	86.2972	66.8127	61.9705	80.43	76.2417
BraE2-72	28.1333	22.5079	15.8759	9.99939	22.8422
BraE2-73	52.2101	65.3888	23.5051	23.8644	31.1843
BraE2-74	14.7782	12.4759	5.82467	78.3652	107.806
BraE2-75	64.2606	53.3487	46.6847	74.4799	124.134
BraE2-76	35.9451	17.9369	18.9618	162.585	25.3054
BraE2-77	81.0324	36.3966	29.9936	42.3591	67.2771
BraE2-78	0	0	0	0	0
BraE2-79	0	0	0	0	0
BraE2-80	100.492	45.6063	53.2541	114.846	139.044
BraE2-81	0	0	0	0	0
BraE2-82	110.62	57.8225	68.2422	93.8335	44.9774
BraE2-83	1.1213	0.410718	0	0	0
