# Supplementary material for: Evolution and Expression Divergence of E2 Gene Family under Multiple Abiotic and Phytohormones Stresses in Brassica rapa
Source: Biomed Res Int. 2018 Aug 27;2018:5206758. doi: 10.1155/2018/5206758 (PMC6129857; doi:10.1155/2018/5206758)
Supplement: Supplementary 7 — Table. 6. Syntenic paralog pair of BraE2 with PC and FPKM values. [file 5206758.f7.xlsx]

## Sheet: Sheet1
Table. 6	Syntenic paralog pair of BraE2 with PC and FPKM values
Gene_ID	Root	Stem	Leaf	Flower	Silique
BraE2-5-BraE2-7 (0.89671)	521.625	234.043	232.875	179.56	452.146
BraE2-6-BraE2-12 (0.733762)	107.879	56.4788	71.8662	175.37	202.548
BraE2-19-BraE2-68 (0.845815)	57.09	19.9638	30.3688	53.3338	61.5378
BraE2-20-BraE2-21 (-0.04821)	72.2709	46.6184	51.5874	62.0178	88.9878
BraE2-24-BraE-25 (0.306023)	87.2874	53.1669	53.426	55.6076	72.8047
BraE2-27-BraE2-29 (0.287456)	152.382	56.5828	97.7018	38.648	73.6912
BraE2-32-BraE2-33 (0.239577)	118.8	37.6691	81.5619	37.1359	68.0179
BraE2-35-BraE2-69 (0.384983)	72.549	55.4826	15.9132	8.58145	32.1891
BraE2-38-BraE2-39 (0.895816)	41.85	17.4676	21.0282	27.1284	67.6946
BraE2-42-BraE2-44 (0.9584)	5.98204	5.39658	2.70065	7.72593	14.7699
BraE2-46-BraE2-48 (0.874904)	7.87029	3.31153	4.34145	12.7832	15.7124
BraE2-56-BraE2-57 (0.879441)	6.59158	0.793189	1.69843	4.62865	0
BraE2-61-BraE2-62 (0.015553)	75.0597	46.6437	41.8503	35.8901	33.5948
BraE2-65-BraE2-66 (0.791393)	33.8919	15.2769	15.214	24.4535	24.5166
BraE2-72-BraE2-73 (0.697466)	40.1717	43.9484	19.6905	16.9319	27.0132
BraE2-74-BraE2-75 (0.914105)	39.5194	32.9123	26.2547	76.4226	115.97
BraE2-81-BraE2-82 (NA)	55.31	28.9112	34.1211	46.9168	22.4887
BraE2-9-BraE2-31 (0.423102)	6.32721	5.43311	21.7894	108.423	115.034
BraE2-15-BraE2-16 (0.938003)	46.9599	58.1305	42.2379	63.9596	118.995
BraE2-17-BraE2-18 (0.407923)	132.078	75.5097	158.281	58.2792	59.4164
BraE2-30-BraE2-34 (0.453099)	196.087	106.708	156.906	235.348	241.143
BraE2-50-BraE2-51 (0.212499)	79.5801	17.6534	8.8597	23.0105	18.84
BraE2-54-BraE2-55 (0.315854)	43.0051	30.0914	30.2796	34.7086	52.8609
BraE2-58-BraE2-59 (NA)	23.6364	8.54435	14.0032	22.3517	29.1362
BraE2-80-BraE2-83 (-0.09499)	50.8067	23.0085	26.6271	57.423	69.522
