# Supplementary material for: Evolution and Expression Divergence of E2 Gene Family under Multiple Abiotic and Phytohormones Stresses in Brassica rapa
Source: Biomed Res Int. 2018 Aug 27;2018:5206758. doi: 10.1155/2018/5206758 (PMC6129857; doi:10.1155/2018/5206758)
Supplement: Supplementary 8 — Table. 7. Cis-elements of BraE2 genes in Brassica rapa. [file 5206758.f8.xlsx]

## Sheet: Sheet1
Table. 7	Cis-Elements of BraE2 genes in Brassica rapa
	Cis-Elements	Function	BraE2-1	BraE2-2	BraE2-4	BraE2-5	BraE2-6	BraE2-7	BraE2-8	BraE2-9	BraE2-10	BraE2-11	BraE2-12	BraE2-13	BraE2-14	BraE2-15	BraE2-16	BraE2-17	BraE2-18	BraE2-19	BraE2-20	BraE2-21	BraE2-22	BraE2-23	BraE2-24	BraE2-25	BraE2-26	BraE2-27	BraE2-28	BraE2-29	BraE2-30	BraE2-31	BraE2-32	BraE2-33	BraE2-34	BraE2-35	BraE2-36	BraE2-37	BraE2-38	BraE2-39	BraE2-40	BraE2-41	BraE2-42	BraE2-44	BraE2-46	BraE2-47	BraE2-48	BraE2-49	BraE2-50
Light Responsive Elements	ACE	cis-acting element involved in light responsiveness	√	√			√	√			√	√			√		√	√		√			√			√			√	√			√	√	√	√	√		√			√			√	√	√	√	√
	AE-Box	part of a module for light response	√	√	√		√				√	√		√		√	√		√				√	√	√	√			√	√	√		√	√		√						√	√		√	√			√
	ATCT-Motif	part of a conserved DNA module involved in light responsiveness	√	√			√					√			√		√		√	√	√	√		√		√					√		√		√		√	√							√		√		√
	GAG-motif	part of a light responsive element	√	√				√	√	√	√	√				√					√			√	√	√	√	√	√		√	√	√	√		√				√					√				√
	I-Box	part of a light responsive element	√		√	√		√	√	√	√	√			√		√					√	√	√			√	√	√	√	√	√	√	√	√	√	√	√	√			√	√		√			√
	LAMP-element	part of a light responsive element	√				√				√						√									√				√	√															√			√
	MNF1	light responsive element	√							√																														√	√					√
	3-AF1 binding site	light responsive element		√				√														√			√			√					√	√	√		√			√	√						√
	Box 4	part of a conserved DNA module involved in light responsiveness		√		√	√		√	√		√			√	√	√			√		√			√	√			√		√	√		√	√		√		√	√		√	√	√	√	√		√
	Box I	light responsive element		√	√	√	√		√				√	√	√			√		√	√	√		√	√	√		√		√		√		√			√	√	√	√		√	√		√		√	√
	Box II	part of a light responsive element							√		√								√													√			√
	box II	part of a light responsive element							√
	GA-Motif	part of a light responsive element		√				√					√								√						√	√							√			√			√	√	√		√			√
	GATA-motif	part of a light responsive element		√	√	√	√	√				√					√													√	√		√			√					√				√		√
	GT1-motif	light responsive element		√	√			√	√	√	√		√		√	√		√	√		√		√	√	√	√	√		√	√			√				√	√		√		√		√		√	√		√
	Sp1	light responsive element		√			√	√	√		√	√	√	√		√	√	√	√			√	√	√											√		√	√			√	√	√				√		√
	as-2-box	involved in shoot-specific expression and light responsiveness		√						√	√		√				√	√									√					√	√														√
	ATC-motif	part of a conserved DNA module involved in light responsiveness			√					√	√														√		√														√	√					√		√
	CATT-motif	part of a light responsive element			√									√				√					√					√												√	√		√		√
	AAAC-motif	light responsive element					√										√
	MRE	MYB binding site involved in light responsiveness					√					√		√	√								√							√					√					√								√
	chs-CMA1a	part of a light responsive element					√					√				√	√																														√
	chs-CMA2a	part of a light responsive element																	√					√															√
	chs-CMA2b	part of a light responsive element																					√
	chs-Unit 1 ml	part of a light responsive element														√											√																	√
	Pc-CMA2c	part of a light responsive element
	TCCC-motif	part of a light responsive element						√				√	√		√		√	√								√				√						√													√
	TCT-motif	part of a light responsive element	√		√	√		√				√		√	√		√	√							√	√	√			√		√	√	√	√			√	√	√		√			√	√		√
	rbcS-CMA7a	part of a light responsive element						√		√	√											√											√													√
	4cl-CMA2b	light responsive element											√															√
	GTGGC-motif	part of a light responsive element											√
	L-box	part of a light responsive element											√		√													√					√
	ATI-motif	part of a light responsive element												√		√				√																			√
	Gap-box	part of a light responsive element									√										√				√																		√
	AuxRE	part of a light responsive element
	Ls-7	part of a light responsive element
	GATT-motif	part of a light responsive element
	C-box	cis-acting regulatory element involved in light responsiveness									√
	G-Box	cis-acting regulatory element involved in light responsiveness	√	√	√	√	√	√	√	√	√		√	√		√	√	√	√	√	√	√	√	√		√	√		√		√		√	√	√		√		√	√	√		√	√	√	√	√		√
Hormone Responsive Elements	ABRE	cis-acting element involved in the abscisic acid responsiveness	√		√		√	√	√	√				√				√	√				√	√		√					√	√		√	√				√		√		√	√	√		√		√
	CGTCA	cis-acting regulatory element involved in the MeJA-responsiveness	√	√	√	√		√		√			√			√			√		√		√				√		√	√	√						√			√	√	√		√	√	√			√
	p-Box	gibberellin-responsive element	√		√		√	√		√		√									√	√				√			√	√								√	√			√	√				√
	TCA-element	cis-acting element involved in salicylic acid responsiveness	√	√	√	√		√		√		√	√		√			√	√	√	√	√			√	√	√	√	√		√						√	√			√	√	√	√		√	√	√	√
	CE1	"cis-acting element associated to ABRE, involved in ABA responsiveness		√
	GARE motif	gibberellin-responsive element		√		√	√	√				√	√		√		√	√	√			√				√				√		√				√	√	√	√			√	√	√	√	√	√		√
	TGA-element	auxin-responsive element		√	√			√	√		√	√			√			√	√	√			√	√		√								√			√		√	√					√	√
	ERE	ethylene-responsive element			√																				√												√	√	√	√	√	√
	TATC-Box	cis-acting element involved in gibberellin-responsiveness			√					√				√	√																					√
	AuxRR-core	cis-acting regulatory element involved in auxin responsiveness						√		√											√		√									√			√						√	√			√
	TGACG-motif	cis-acting regulatory element involved in the MeJA-responsiveness	√	√	√	√		√		√	√		√			√			√		√		√				√		√	√	√						√			√	√			√	√	√			√
	motif IIb	abscisic acid responsive element																											√
	CE3	cis-acting element involved in ABA and VP1 responsiveness
Heat and Cold stress	HSE	cis-acting element involved in heat stress responsiveness	√	√		√	√		√				√	√						√					√	√							√	√	√	√		√	√		√		√	√			√		√
	LTR	cis-acting element involved in low-temperature responsiveness	√	√	√	√	√	√								√	√		√	√	√			√	√	√	√		√	√				√					√		√							√
	C-repeats/DRE	regulatory element involved in cold- and dehydration-responsiveness														√
	DRE	"cis-acting element involved in dehydration, low-temp, salt stresses																									√
Others Elements	5UTR Py-rich stretch	cis-acting element conferring high transcription levels	√			√		√		√				√	√		√			√	√		√	√	√	√		√	√		√	√				√	√	√	√	√	√		√	√		√	√	√
	ARE	cis-acting regulatory element essential for the anaerobic induction	√			√	√	√	√	√			√	√	√		√	√			√	√	√	√	√	√	√		√	√	√	√		√		√	√		√	√	√	√	√	√	√	√	√	√	√
	Box-W1	fungal elicitor responsive element	√		√		√			√			√	√						√	√	√	√	√			√			√	√	√	√				√		√	√		√			√	√
	CAAT-Box	common cis-acting element in promoter and enhancer regions	√	√	√	√	√	√	√	√	√		√	√	√	√	√	√	√	√	√	√	√	√	√	√	√	√	√	√	√	√	√	√	√	√	√	√	√	√	√	√	√	√	√	√	√	√	√
	skn-1 _motif	cis-acting regulatory element required for endosperm expression	√	√	√	√	√	√	√	√	√	√	√	√	√	√	√	√	√	√	√	√	√	√	√	√	√		√	√	√	√	√		√	√	√	√	√	√		√	√	√	√		√	√	√
	TATA-Box	core promoter element around -30 of transcription start	√	√	√	√	√	√	√	√	√		√	√	√	√	√		√	√	√	√	√	√	√	√	√	√	√	√	√	√	√	√	√	√	√	√	√	√	√		√	√	√	√	√	√	√
	Wun-motif	wound-responsive element	√											√				√				√																					√				√
	CCAAT-box	MYBHv1 binding site		√							√													√				√	√							√	√				√				√	√
	EIRE	elicitor-responsive element		√																							√																					√
	O2-site	cis-acting regulatory element involved in zein metabolism regulation		√	√				√	√					√			√				√	√					√			√	√	√	√	√				√	√			√	√					√
	AT-rich element	binding site of AT-rich DNA binding protein				√		√																			√								√											√
	Box III	protein binding site				√			√																																								√
	MBS	MYB binding site involved in drought-inducibility					√	√	√		√		√	√		√		√	√		√	√	√	√		√		√	√	√	√	√	√	√	√	√		√	√		√	√	√			√			√
	CAT-box	cis-acting regulatory element related to meristem expression							√					√		√	√					√	√	√	√		√	√	√	√				√						√		√		√			√	√	√
	CCGTCC-box	cis-acting regulatory element related to meristem specific acti							√							√			√																		√				√						√		√
	GCN4_motif	cis-regulatory element involved in endosperm expression							√		√	√				√					√	√				√	√	√		√	√				√			√	√	√									√
	TC-rich repeats	cis-acting element involved in defense and stress responsiveness		√	√	√		√	√			√	√	√	√	√	√	√		√	√	√	√	√	√	√		√	√	√	√		√	√	√	√	√	√	√	√	√		√	√		√	√		√
	GC-motif	enhancer-like element involved in anoxic specific inducibility															√		√		√																				√								√
	EIRE	elicitor-responsive element		√																√							√																					√
	RY-element	cis-acting regulatory element involved in seed-specific regulation										√						√
	TA-rich Region	enhancer																		√															√
	HD-Zip 1	element involved in differentiation of the palisade mesophyll cells																									√
	HD-Zip 2	element involved in the control of leaf morphology development																									√
	MBSI	MYB binding site involved in flavonoid biosynthetic genes regulation																											√
	MBSII	MYB binding site involved in flavonoid biosynthetic genes regulation
	EL1-box3	elicitor-responsive element																												√															√
	MSA-like	cis-acting element involved in cell cycle regulation																																		√	√
	AT-rich sequence	element for maximal elicitor-mediated activation (2copies)																												√
	AACA_motif	involved in endosperm-specific negative expression
	OCT	cis-acting regulatory element related to meristem specific activation																																					√
Circadian	Circadian	cis-acting regulatory element involved in circadian control			√	√	√	√		√	√	√	√	√			√	√	√	√	√	√		√			√	√	√	√			√		√	√				√		√	√	√	√	√	√		√
[truncated: 33 more columns]
