# Supplementary material for: Evolution and Expression Divergence of E2 Gene Family under Multiple Abiotic and Phytohormones Stresses in Brassica rapa
Source: Biomed Res Int. 2018 Aug 27;2018:5206758. doi: 10.1155/2018/5206758 (PMC6129857; doi:10.1155/2018/5206758)
Supplement: Supplementary 9 — Table. 8. Relative expression pattern of BraE2 genes along with PC values with respect to various stresses by qRT-PCR. [file 5206758.f9.xlsx]

## Sheet: Sheet1
	Table. 8	Relative Expression pattern of BraE2 genes along with PC values with respect to various stresses by qRT-PCR
Gene	ABA-1	ABA-6	ABA-12	Pearson Correlation		Gene	GA-1	GA-6	GA-12	Pearson Correlation		Gene	JA-1	JA-6	JA-12	Pearson Correlation		Gene	BR-1	BR-6	BR-12	Pearson Correlation		Gene	PEG-1	PEG-6	PEG-12	Pearson Correlation		Gene	NaCl-1	NaCl-6	NaCl-12	Pearson Correlation		Gene	Heat-1	Heat-6	Heat-12	Pearson Correlation		Gene	Cold-1	Cold-6	Cold-12	Pearson Correlation
BraE2-5	0.0475874	0.968217	0.232635			BraE2-5	0.230317	0.188789	1.20195			BraE2-5	0.827807	1.17305	1.19819			BraE2-5	0.40045	0.0293417	0.117043			BraE2-5	1.21569	6.93037	1.14431			BraE2-5	2.28861	0.0494097	1.15498			BraE2-5	2.56798	0.792053	0.05611			BraE2-5	0.0494097	1.15498	0.712947
BraE2-7	0.0662232	0.0975822	0.172707	-0.0418166		BraE2-7	0.515929	0.123446	2.06412	0.987823		BraE2-7	0.524355	3.20125	10.0312	0.758434		BraE2-7	2.5528	0.0185858	0.130711	0.982214		BraE2-7	0.0391722	31.8973	0.832361	0.999469		BraE2-7	1.66472	0.0252706	0.483101	0.970779		BraE2-7	16.3895	0.202004	0.0489123	0.960831		BraE2-7	0.0252706	0.483101	0.590112	0.832201
BraE2-6	0.535526	0.712289	1.17443			BraE2-6	2.43312	0.346124	0.0146024			BraE2-6	1.13081	0.363494	0.00632411			BraE2-6	0.0122536	194.685	0.146689			BraE2-6	0.015696	44.2379	0.915332			BraE2-6	1.83066	1.51666	8.45615			BraE2-6	1.30712	15.7079	1.19967			BraE2-6	1.51666	8.45615	3.13136
BraE2-12	57.0285	1.56707	2.28439	-0.705792		BraE2-12	2.9018	0.507365	6.44372	-0.235666		BraE2-12	15.853	0.785143	11.3248	0.483594		BraE2-12	1.98646	0.15383	0.119131	-0.486391		BraE2-12	1.28329	0.235617	17.2577	-0.531813		BraE2-12	34.5155	0.144138	80.7165	0.921465		BraE2-12	0.427208	0.688331	10.3354	-0.48548		BraE2-12	0.144138	80.7165	14.2241	0.998208
BraE2-19	1.41159	0.576389	0.961393			BraE2-19	2.41093	0.258417	1.64426			BraE2-19	47.6406	2.55737	2.0371			BraE2-19	1.29533	0.247823	0.19493			BraE2-19	61.1217	1.39048	27.8303			BraE2-19	55.6605	0.656821	0.986936			BraE2-19	1.98961	3.32737	5.31336			BraE2-19	0.656821	0.986936	5.10963
BraE2-68	70.2136	1.28757	1.36987	0.888134		BraE2-68	7.19801	0.493728	5.09213	0.998902		BraE2-68	5.87167	4.92358	18.7318	-0.454701		BraE2-68	3.1478	0.128648	5.3611	0.0460408		BraE2-68	47.4141	2.45297	16.8218	0.990319		BraE2-68	33.6436	0.578958	81.4756	-0.0996259		BraE2-68	0.309154	5.23759	3.11362	0.471525		BraE2-68	0.578958	81.4756	76.0769	0.505928
BraE2-38	0.0212685	0.0103542	0.0179157			BraE2-38	0.0267046	0.01866	0.095348			BraE2-38	0.265353	0.0931303	0.290627			BraE2-38	0.0592408	0.0189045	0.00759664			BraE2-38	0.0184802	0.00479287	0.119273			BraE2-38	0.238545	0.00950066	0.042777			BraE2-38	115.552	0.133633	0.733327			BraE2-38	0.00950066	0.042777	0.205962
BraE2-39	0.0884458	0.0658835	0.142038	0.489588		BraE2-39	0.215664	0.0765899	0.190117	0.431152		BraE2-39	1.24969	0.310707	0.927723	0.895167		BraE2-39	0.038524	0.0593831	0.0222724	0.137802		BraE2-39	15.8688	0.0664895	0.515178	-0.37924		BraE2-39	1.03036	0.037915	1.53396	0.315812		BraE2-39	4.73093	0.052243	0.308054	0.999026		BraE2-39	0.037915	1.53396	1.01049	0.324534
BraE2-42	0.0375767	0.0115826	0.375963			BraE2-42	0.0581484	0.02991	0.122763			BraE2-42	0.481309	0.121421	0.0976425			BraE2-42	0.0620779	0.12121	0.0479779			BraE2-42	0.0172391	0.176664	0.76403			BraE2-42	1.52806	0.4938	0.00302779			BraE2-42	4.12135	0.308249	0.492867			BraE2-42	0.4938	0.00302779	0.118194
BraE2-44	0.374795	3.82342	0.1386	-0.60109		BraE2-44	5.14661	0.0391347	0.749263	-0.0936137		BraE2-44	1.13227	0.096278	0.114109	0.997525		BraE2-44	0.0308936	0.0321389	0.0237641	0.74749		BraE2-44	0.2657	1.21579	0.663951	0.110803		BraE2-44	1.3279	0.0779549	2.30819	-0.248354		BraE2-44	2.11019	0.152436	1.97202	0.588995		BraE2-44	0.0779549	2.30819	1.09926	-0.940792
BraE2-46	0.794571	17.4	1.76899			BraE2-46	21.4344	0.0893736	7.29607			BraE2-46	17.4518	0.759325	4.69089			BraE2-46	0.149031	0.0865944	0.153186			BraE2-46	4.07269	9.58027	2.97774			BraE2-46	5.95548	3.16918	10.1433			BraE2-46	2.16616	1.03343	4.72486			BraE2-46	3.16918	10.1433	38.3674
BraE2-48	1.1331	1.49316	0.907408	0.902938		BraE2-48	14.6033	0.0966011	1.05753	0.961332		BraE2-48	120.539	0.203184	4.92858	0.981522		BraE2-48	0.246336	0.0784313	0.108789	0.595874		BraE2-48	3.09511	0.1682	10.5085	-0.81752		BraE2-48	21.0169	0.142068	21.5568	0.815619		BraE2-48	1.41481	2.08535	0.228068	-0.998181		BraE2-48	0.142068	21.5568	6.11437	-0.0617319
BraE2-56	0.392344	0.286668	0.502695			BraE2-56	0.759674	1.58887	0.828478			BraE2-56	0.2438	0.986428	0.498144			BraE2-56	4.97729	0.771668	4.17161			BraE2-56	0.448673	5.06806	0.387009			BraE2-56	0.774018	6.60839	0.506737			BraE2-56	0.303765	0.178343	12.618			BraE2-56	6.60839	0.506737	0.88133
BraE2-57	6.82054	7.40059	0.552671	-0.907016		BraE2-57	4.5963	2.48015	2.48266	-0.564193		BraE2-57	7.89363	2.41943	3.829	-0.899165		BraE2-57	0.120382	0.196626	1.94702	0.300518		BraE2-57	23.1715	3.72389	4.6998	-0.528356		BraE2-57	9.39961	0.194675	13.6889	-0.961732		BraE2-57	0.803893	0.582203	1.4878	0.974063		BraE2-57	0.194675	13.6889	3.00579	-0.701231
BraE2-65	34.0088	0.462097	1.74104			BraE2-65	2.4055	0.0358544	0.0908877			BraE2-65	70.0302	0.072738	0.15985			BraE2-65	0.0638909	0.0363424	1.84534			BraE2-65	112.5	0.344862	5.93358			BraE2-65	11.8672	1.0013	1.98971			BraE2-65	0.038949	0.420956	3.38656			BraE2-65	1.0013	1.98971	20.7966
BraE2-66	5.12818	3.90719	64.6235	-0.454992		BraE2-66	6.15905	1.2994	16.9638	-0.194125		BraE2-66	5.75192	3.20652	33.9411	-0.433017		BraE2-66	3.23433	0.61982	137.557	0.999994		BraE2-66	6.40603	1.14961	8.62522	0.271191		BraE2-66	17.2504	1.722	10.1561	0.881851		BraE2-66	0.176315	5.21038	5.17381	0.582424		BraE2-66	1.722	10.1561	3.97131	-0.21709
BraE2-72	0.0786071	0.948011	0.736272			BraE2-72	2.06979	0.77769	2.44386			BraE2-72	0.437203	1.52941	0.37369			BraE2-72	0.761163	0.151734	0.396483			BraE2-72	0.0159267	0.0329315	0.6497			BraE2-72	1.2994	0.389255	0.197338			BraE2-72	14.1732	1.98077	7.73901			BraE2-72	0.389255	0.197338	0.536196
BraE2-73	0.600122	1.15603	0.600875	0.689262		BraE2-73	37.0202	0.901486	0.0685293	0.284269		BraE2-73	4.68066	0.0913677	0.178623	-0.471792		BraE2-73	0.112467	0.320466	0.581487	-0.540941		BraE2-73	0.211274	9.2541	2.18889	-0.286455		BraE2-73	4.37778	1.38673	0.721082	0.999968		BraE2-73	2.14646	6.95107	1.93789	-0.829617		BraE2-73	1.38673	0.721082	1.12945	0.66716
BraE2-74	0.169484	1.92736	12.747			BraE2-74	1.60119	1.01206	25.7471			BraE2-74	0.515827	2.01208	35.0542			BraE2-74	6.32447	1.02544	0.0311346			BraE2-74	3.1241	0.0371999	1.51288			BraE2-74	3.02576	1.62979	0.168027			BraE2-74	2.10079	2.08538	31.9129			BraE2-74	1.62979	0.168027	1.49592
BraE2-75	0.322697	3.15377	2.49809	0.416815		BraE2-75	3.05246	0.635936	10.3046	0.975543		BraE2-75	0.402646	0.404507	14.8732	0.99927		BraE2-75	0.246213	0.154613	0.0226321	0.886988		BraE2-75	1.60282	0.0300974	0.639161	0.994586		BraE2-75	1.27832	0.667638	2.08115	-0.577131		BraE2-75	1.04297	5.57086	1.53583	-0.41203		BraE2-75	0.667638	2.08115	0.778415	-0.999923
BraE2-9..	0.520086	0.936761	1.53643			BraE2-9..	6.11696	7.77646	7.79305			BraE2-9..	2.79309	0.0743237	12.4906			BraE2-9..	1.34475	0.14827	0.0732406			BraE2-9..	0.0236534	1.14101	1.23201			BraE2-9..	2.46402	0.615342	0.0226888			BraE2-9..	0.03899	4.66727	3.03264			BraE2-9..	0.615342	0.0226888	1.89335
BraE2-31..	0.076528	0.638156	1.2842	0.998001		BraE2-31..	1.2719	0.810888	5.20719	0.422923		BraE2-31..	0.115881	0.407831	7.85044	0.970592		BraE2-31..	1.63804	0.0314817	0.209805	0.98816		BraE2-31..	5.22562	1.62102	0.150386	-0.976379		BraE2-31..	0.300772	1.65854	0.283308	-0.274115		BraE2-31..	1.05878	0.199211	10.1725	0.0899692		BraE2-31..	1.65854	0.283308	1.6049	0.72035
BraE2-17	0.0620314	0.196469	0.0947887			BraE2-17	1.27046	1.68502	1.03398			BraE2-17	6.06092	2.5809	0.12497			BraE2-17	1.62275	0.0193576	0.0636638			BraE2-17	15.8561	0.0608454	3.49761			BraE2-17	6.99522	0.735272	0.0491759			BraE2-17	0.980957	0.731877	8.94774			BraE2-17	0.735272	0.0491759	2.41319
BraE2-18	0.00133471	0.00120208	0.00815566	-0.299772		BraE2-18	0.00517086	0.000982774	0.000245431	-0.0174065		BraE2-18	0.0090875	0.000260409	0.000315585	0.90907		BraE2-18	0.000162089	0.000106951	0.000305243	-0.224676		BraE2-18	0.0210657	0.0083284	0.0272989	0.392901		BraE2-18	0.0545978	0.000187952	0.00428479	0.987638		BraE2-18	36.0992	0.00320121	0.00776874	-0.476647		BraE2-18	0.000187952	0.00428479	0.0166884	0.864478
BraE2-30	2.16638	1.17487	2.45055			BraE2-30	3.98708	0.637681	8.08747			BraE2-30	14.261	3.43997	2.19752			BraE2-30	0.984062	0.296411	0.136627			BraE2-30	0.347999	0.631144	50.7967			BraE2-30	101.593	0.381145	19.4375			BraE2-30	0.0821331	0.958239	25.9025			BraE2-30	0.381145	19.4375	53.4507
BraE2-34	0.0374786	9.41441	4.66669	-0.745118		BraE2-34	9.46075	1.21189	38.4177	0.96822		BraE2-34	1.17416	2.99719	3.00747	-0.996052		BraE2-34	6.06066	2.00875	0.767214	0.998858		BraE2-34	0.00209905	0.0200229	1.86386	0.999994		BraE2-34	3.72772	0.725964	0.0169903	0.936237		BraE2-34	0.404922	0.788736	0.049004	-0.839056		BraE2-34	0.725964	0.0169903	2.38799	0.791305
BraE2-54	0.41587	406.999	3.9299			BraE2-54	0.492906	0.252925	10.0836			BraE2-54	0.202742	3.10682	1.94238			BraE2-54	2.50851	0.298397	1.96895			BraE2-54	0.0315934	0.299617	0.321833			BraE2-54	0.643666	0.99554	0.0122139			BraE2-54	0.394702	6.6233	0.270761			BraE2-54	0.99554	0.0122139	62.837
BraE2-55	0.223216	0.267932	1.6117	-0.468633		BraE2-55	0.134975	0.0108154	0.0863949	0.145774		BraE2-55	0.0514736	0.0851092	0.0876976	0.889829		BraE2-55	0.0848685	0.0162559	0.212043	0.597092		BraE2-55	4.15239	1.6265	0.115246	-0.952124		BraE2-55	0.230492	0.010319	0.0127454	0.152506		BraE2-55	19.311	0.0397073	0.0138837	-0.484138		BraE2-55	0.010319	0.0127454	0.605156	0.999852
BraE2-35	0.138933	0.570551	0.283926			BraE2-35	0.553806	0.0365506	0.180155			BraE2-35	0.35685	0.285105	0.452329			BraE2-35	0.179741	0.232884	0.0358628			BraE2-35	0.00414848	3.69922	0.566465			BraE2-35	1.13293	0.139887	0.878019			BraE2-35	2.6946	0.10923	32.0288			BraE2-35	0.139887	0.878019	3.22123
BraE2-69	1.57447	1.56066	12.7126	-0.187198		BraE2-69	5.60229	2.52841	1.02017	0.824724		BraE2-69	6.2172	0.997843	0.195066	-0.20339		BraE2-69	5.08417	1.25389	0.158111	0.455851		BraE2-69	0.0245546	0.312301	11.1171	-0.351481		BraE2-69	22.2343	0.32288	0.497228	0.703445		BraE2-69	0.389719	1.32328	0.306862	-0.621017		BraE2-69	0.32288	0.497228	8.3371	0.977525
