# Supplementary material for: Evolution and Expression Divergence of E2 Gene Family under Multiple Abiotic and Phytohormones Stresses in Brassica rapa
Source: Biomed Res Int. 2018 Aug 27;2018:5206758. doi: 10.1155/2018/5206758 (PMC6129857; doi:10.1155/2018/5206758)
Supplement: Supplementary 10 — Table. 9. Pearson correlation coefficient of the stress-induced BraE2 genes whose PC is greater than 0.5. [file 5206758.f10.xlsx]

## Sheet: Sheet1
Table. 9	Pearson correlation coefficient of the stress-induced BraE2 genes whose PC is greater than 0.5
Various Stresses	Gene 1	Gene 2	Correlation Coefficient
ABA	BraE2-19	BraE2-68	0.888134
	BraE2-46	BraE2-48	0.902938
	BraE2-72	BraE2-73	0.689262
	BraE2-9..	BraE2-31..	0.998001
GA	BraE2-5	BraE2-7	0.987823
	BraE2-19	BraE2-68	0.998902
	BraE2-46	BraE2-48	0.961332
	BraE2-74	BraE2-75	0.975543
	BraE2-30	BraE2-34	0.96822
	BraE2-35	BraE2-69	0.824724
JA	BraE2-5	BraE2-7	0.758434
	BraE2-38	BraE2-39	0.895167
	BraE2-42	BraE2-44	0.997525
	BraE2-46	BraE2-48	0.981522
	BraE2-74	BraE2-75	0.99927
	BraE2-9..	BraE2-31..	0.970592
	BraE2-17	BraE2-18	0.90907
	BraE2-54	BraE2-55	0.889829
BR	BraE2-5	BraE2-7	0.982214
	BraE2-42	BraE2-44	0.74749
	BraE2-46	BraE2-48	0.595874
	BraE2-65	BraE2-66	0.999994
	BraE2-74	BraE2-75	0.886988
	BraE2-9..	BraE2-31..	0.98816
	BraE2-30	BraE2-34	0.998858
	BraE2-54	BraE2-55	0.597092
PEG	BraE2-5	BraE2-7	0.999469
	BraE2-19	BraE2-68	0.990319
	BraE2-74	BraE2-75	0.994586
	BraE2-30	BraE2-34	0.999994
NaCl	BraE2-5	BraE2-7	0.970779
	BraE2-6	BraE2-12	0.921465
	BraE2-46	BraE2-48	0.815619
	BraE2-65	BraE2-66	0.881851
	BraE2-72	BraE2-73	0.999968
	BraE2-17	BraE2-18	0.987638
	BraE2-30	BraE2-34	0.936237
	BraE2-35	BraE2-69	0.703445
Heat	BraE2-5	BraE2-7	0.960831
	BraE2-38	BraE2-39	0.999026
	BraE2-42	BraE2-44	0.588995
	BraE2-56	BraE2-57	0.974063
	BraE2-65	BraE2-66	0.582424
Cold	BraE2-5	BraE2-7	0.832201
	BraE2-6	BraE2-12	0.998208
	BraE2-19	BraE2-68	0.505928
	BraE2-72	BraE2-73	0.66716
	BraE2-9..	BraE2-31..	0.72035
	BraE2-17	BraE2-18	0.864478
	BraE2-30	BraE2-34	0.791305
	BraE2-54	BraE2-55	0.999852
	BraE2-35	BraE2-69	0.977525
